# Supplementary material for: Differential Long-Term Population Responses of Two Closely Related Human-Associated Sparrow Species with Respect to Urbanization
Source: MDPI journal article supplement (doi:10.3390/birds2030017), 2021-07-24
Supplement: s1 [file s1]

**Table S1.** Population trends of the House Sparrow and the Eurasian Tree Sparrow in European countries since 2000 based on the data of BirdLife International (2017). Countries (four) where the House Sparrow is decreased and the Eurasian Tree Sparrow is increased at the same time are in **bold**. Countries (six) where both sparrow species have declined are in *italics*.

|                       | Decreased                                                                                                                                                       | Increased                                                                                                | Stable                                                                                                                                    | Unknown                                                                              |
|-----------------------|-----------------------------------------------------------------------------------------------------------------------------------------------------------------|----------------------------------------------------------------------------------------------------------|-------------------------------------------------------------------------------------------------------------------------------------------|--------------------------------------------------------------------------------------|
| House Sparrow         | Albania, <b>Bulgaria</b> , <i>Czech Republic, Estonia, Germany, Hungary, Lichtenstein, Luxembourg, Poland, Serbia, Slovakia, Spain, Sweden, Turkey, Ukraine</i> | Cyprus, Gibraltar, Ireland, Lithuanian, Slovenia                                                         | Austria, Belarus, Belgium, Denmark, Finland, France, Greece, Iceland, Moldova, Netherlands, Portugal, Russia, Switzerland, United Kingdom | Andorra, Armenia, Azerbaijan, Croatia, Georgia, Italy, Macedonia, Montenegro, Norway |
|                       | 15 countries                                                                                                                                                    | 5 countries                                                                                              | 14 countries                                                                                                                              | 9 countries                                                                          |
| Eurasian Tree Sparrow | Belgium, <i>Czech Republic, Estonia, France, Germany, Greece, Italy, Luxembourg, Malta, Netherlands, Serbia, Spain</i>                                          | <b>Bulgaria</b> , Finland, Ireland, <b>Lichtenstein, Poland</b> , Sweden, <b>Turkey</b> , United Kingdom | Austria, Belarus, Denmark, Hungary, Latvia, Lithuanian, Moldova, Slovakia, Switzerland                                                    | Croatia, Georgia, Kosovo, Macedonia, Montenegro, Norway, Portugal, Russia, Slovenia  |
|                       | 12 countries                                                                                                                                                    | 9 countries                                                                                              | 9 countries                                                                                                                               | 9 countries                                                                          |

**Table S2.** Population trends with indices of the House Sparrow and the Eurasian Tree Sparrow in Finland according to the different bird monitoring.

| Time frame              | House Sparrow                                                                                                                                                                                                                                                                                                                                                               | Eurasian Tree Sparrow                                                                                                                                                                                                                                                                                                                                                                                                                                    | Data type                                                                                | Reference                    |
|-------------------------|-----------------------------------------------------------------------------------------------------------------------------------------------------------------------------------------------------------------------------------------------------------------------------------------------------------------------------------------------------------------------------|----------------------------------------------------------------------------------------------------------------------------------------------------------------------------------------------------------------------------------------------------------------------------------------------------------------------------------------------------------------------------------------------------------------------------------------------------------|------------------------------------------------------------------------------------------|------------------------------|
| 1990/2000/2010          | Urban: 160/75/55<br>Rural: 80/50/25<br>(ind./10 km)                                                                                                                                                                                                                                                                                                                         | Urban: 2/6/20<br>Rural: 2/11/22<br>(ind./10 km)                                                                                                                                                                                                                                                                                                                                                                                                          | Winter line transect; ornithologists                                                     | Lehikoinen & Väisänen 2014   |
| 1974-79/1986-89/2006-10 | 1754/1641/2106<br>(numb. of 10kmx10km squares where breeding was confirmed or probable)                                                                                                                                                                                                                                                                                     | 28/97/1148<br>(numb. of 10kmx10km squares where breeding was confirmed or probable)                                                                                                                                                                                                                                                                                                                                                                      | Breeding bird atlas; ornithologists                                                      | Valkama et al. 2011          |
| 1975-2012               | Abundance: Decreased about 60% during the last 29 years; decreasing very deeply especially during the end 1980s. Decreased on average 2.8%/year during 1984-2012                                                                                                                                                                                                            | Abundance: Increased 4x during the last eight years. Increased on average 20.9/year during 2005-2012.                                                                                                                                                                                                                                                                                                                                                    | Breeding land bird monitoring; line transects, point counts and mappings; Ornithologists | Väisänen & Lehikoinen (2013) |
| 1989-2017               | Occupancy: Occupy currently 75% of the Finnish feeding sites. Decrease about 20-40%, more deeply in southern than in northern Finland<br>Abundance: Decreased about 1/10 in southern, 1/3 in central and 50% in northern Finland during the last 29 years. Decreasing rate on average 8.3%/a in southern, 3.9%/a in central and 3.5%/a in northern Finland during 1989-2017 | Occupancy: Occupy currently 46% of the Finnish feeding sites. Occupancy started to increase in southern and central Finland during the early 1990s, and northern Finland during 2000-2005.<br>Abundance: Increased 4-5x in southern and central Finland during 2002-2017; increased 4-5x in northern Finland during the 2010 century. Increasing rate on average 6.6%/a in southern, 9.1%/a in central and 13.5%/a in northern Finland during 2002-2017. | Feeding site monitoring; Citizen-Science project                                         | Väisänen (2018)              |

|                                                                                                                                                                                                 |                                                                                                                                   |                                                                                          |                                                           |                          |
|-------------------------------------------------------------------------------------------------------------------------------------------------------------------------------------------------|-----------------------------------------------------------------------------------------------------------------------------------|------------------------------------------------------------------------------------------|-----------------------------------------------------------|--------------------------|
| Currently, the occupancy (%) and abundance is about the same in different areas of Finland. In some place the Eurasian Tree Sparrow is now even more common and abundant than the House Sparrow |                                                                                                                                   |                                                                                          |                                                           |                          |
| 2006/2010/2020                                                                                                                                                                                  | Occupancy:<br>30/26/20 (% of sites)<br>Abundance:<br>2.4/2.3/1.4 (ind./yard)                                                      | Occupancy:<br>15/23/44 (% of sites)<br>Abundance:<br>0.9/2.1/4.1 (ind./yard)             | Yard Birding Event during winter; Citizen-Science project | BirdLife Finland (2020a) |
| 2013/2015/2019                                                                                                                                                                                  | Occupancy: 1.5/4.4/3.5 (% of sites)<br>Abundance:<br>0.2/0.7/0.6 (% in nest boxes)                                                | Occupancy:<br>12.8/14.6/19.7 (% of sites)<br>Abundance:<br>2.7/3.2/4.2 (% in nest boxes) | Nest-box Twitching Event; Citizen-Science project         | BirdLife Finland (2020b) |
| 1979-2019                                                                                                                                                                                       | Numb. of observed individuals index:<br>8537% increase (from 1979-99 to 2011-2019)<br>680% increase (from 2000-2010 to 2011-2019) |                                                                                          |                                                           |                          |
|                                                                                                                                                                                                 |                                                                                                                                   |                                                                                          | Hanko Bird Observatory records; Ornithologists            | Lehikoinen (2019)        |
